# Supplementary material
Source: PubMed Central journal article supplement (PMC3816405)
Supplement: 1317397110_pnas.201317397SI.pdf [file 1317397110_pnas.201317397SI.pdf]

# Supporting Information

Fu et al. 10.1073/pnas.1317397110

## SI Materials and Methods

**Cell Culture and Transfection.** HEK293T cells were obtained from the American Type Culture Collection and maintained in Dulbecco's modified Eagle's medium (DMEM) supplemented with 10% (vol/vol) FBS, 100 U/mL penicillin G, and 100 U/mL streptomycin. Transfections of microRNA (miRNA) precursors (20 nM; Ambion) or miRCURY miR-26 power family inhibitors (20 nM; Exiqon) were performed using HiPerfect (Qiagen) according to the manufacturer's protocol. For ten eleven translocation 2 (TET2) overexpression, dissociated pancreatic CD133<sup>+</sup> cells were transfected with or without TET2 overexpression plasmid (1) using Attractene (Qiagen) according to the manufacturer's protocol.

**Real-Time Quantitative RT-PCR.** Total RNA was extracted using Tri-Reagent (Molecular Research Center), and cDNA was synthesized using SuperScript III reverse transcriptase (Invitrogen), as described previously (2). Real-time quantitative RT-PCR (qRT-PCR) analyses of mRNA and miRNA were performed with the Power SYBR Green PCR Master Mix (Applied Biosystems) according to the manufacturer's instructions. qRT-PCR primers are listed as follows.

**Luciferase Reporter Assays.** Primers sequences for 3'-UTR cloning are listed as follows.

### mRNA qRT-PCR primers

| Gene            | Strand | Sequence (5'-3')         |
|-----------------|--------|--------------------------|
| Tet1 (human)    | F      | GAGGAAAAGAAGCCCAAAG      |
|                 | R      | TCTTCCCCATGACCACATCT     |
| Tet2 (human)    | F      | AGAAAAGGGAAAGGAGAGCG     |
|                 | R      | GAGAGGGTGTGCTGCTGAAT     |
| Tet3 (human)    | F      | GAGGAAAAGAAGCCCAAAG      |
|                 | R      | TCTTCCCCATGACCACATCT     |
| TDG (human)     | F      | TGAAGCTCCTAATATGGCAGTTG  |
|                 | R      | GGTTCTGTGTGTTCTGGGTTTTCT |
| Tet1 (mouse)    | F      | GAGCCTGTTTCCCTCGATGTGG   |
|                 | R      | CAAACCCACCTGAGGCTGTT     |
| Tet2 (mouse)    | F      | TGTTGTGTGTCAGGGTGAGAATC  |
|                 | R      | TCTTGCTTCTGGCAAACCTTACA  |
| Tet3 (mouse)    | F      | CCGATTGAGAAGGTCATCTAC    |
|                 | R      | AAGATAACAATCAGGCGTTCT    |
| TDG (mouse)     | F      | TAGGAAACGTGCGTGTTCAG     |
|                 | R      | CTCATACTGCCAAACCAGCA     |
| β-actin (human) | F      | GTTGCTATCCAGGCTGTGCT     |
|                 | R      | AGGGCATACCCTCGTAGAT      |
| β-actin (mouse) | F      | TAGGCACCAGGTTGTGATG      |
|                 | R      | CATGGCTGGGGTGTGGAAGG     |

TDG, thymine DNA glycosylase.

### miRNA qRT-PCR primers

| Name       | Sequence (5'-3')                 |
|------------|----------------------------------|
| miRGS-T    | CATGATCAGCTGGGCCAAGA             |
| miR-26a-F  | TT+CA+AGTAATCCAGGA               |
| miR-26a-GS | CATGATCAGCTGGGCCAAGAAGCCTATCCTGG |
| miR-26b-F  | TT+CAAGTAAT+TCAGGA               |
| miR-26b-GS | CATGATCAGCTGGGCCAAGAACCCTATCCTGA |

Note: "+" means LNA (locked nucleic acid) substitution.

**Dissociation of Adult Pancreas.** Pancreata from 2- to 4-mo-old mice were dissected and dissociated into single-cell suspension as de-

### Primers for 3'-UTR cloning

| Gene              | Strand | Sequence (5'-3')       | Size (bp) |
|-------------------|--------|------------------------|-----------|
| Tet1 (human)      | F      | GGGCTCGAGCCCTATAAC     | 2,531     |
|                   | R      | CATTGGGTCTGAAG         |           |
| Tet2-s1 (human)   | F      | ATAAGAAATGCGGCCGCATCAG | 279       |
|                   | R      | GAAAGAGAGTCCAACAAAG    |           |
| Tet2-s2 (human)   | F      | AGTCTCGAGACTTACC       | 1,206     |
|                   | R      | TGCGTTTCATCAAGTCT      |           |
| Tet2-s3+4 (human) | F      | CTACTAGTAGATAACCTCT    | 383       |
|                   | R      | TTTGTGCTGGTG           |           |
| Tet2-S5+6 (human) | F      | AGTCTCGAGACTGGTTCTA    | 433       |
|                   | R      | TTATTGGACGAGATG        |           |
| Tet3 (human)      | F      | CTACTAGTAGATTCACATGG   | 5,042     |
|                   | R      | AACCTAACCTGT           |           |
| TDG (human)       | F      | TTCCTCGAGAACTGAGAGTG   | 1,976     |
|                   | R      | AAAGCATTGTGT           |           |
| Tet3 (human)      | F      | GAAGTCTCCTGCTTGAAC     | 5,042     |
|                   | R      | AGTCAAAAAGA            |           |
| TDG (human)       | F      | CAACTCGAGTTGGGGAGAGT   | 1,976     |
|                   | R      | TTACATAAGGAAG          |           |
| Tet3 (human)      | F      | AAGGAAAAAGCGGCCGCAAA   | 5,042     |
|                   | R      | AGGAAAACAGCTTTCAAAT    |           |
| TDG (human)       | F      | AACCTGCATTC            | 1,976     |
|                   | R      | TAGGCGATCGCCTATGCCT    |           |
| Tet3 (human)      | F      | ACACGAAGGTCACTG        | 5,042     |
|                   | R      | GTACTAGTACTTGCAATTT    |           |
| TDG (human)       | F      | CTAGGCACCTAA           | 1,976     |
|                   | R      | CCACTCGAGTGGAGTTAAGA   |           |
| TDG (human)       | F      | GGAGAATCAGCTT          | 1,976     |
|                   | R      | TAACTAGTTAAAGGGGAAAGA  |           |
| TDG (human)       | F      | ATACCACTCAG            | 1,976     |
|                   | R      |                        |           |

scribed (3). In short, minced tissue was placed in phosphate buffered saline (PBS)/bovine serum albumin (BSA)-containing collagenase B (2–4 mg/mL per pancreas) (Roche) and DNase I (2,000 U/mL per pancreas) (Calbiochem), and incubated at 37 °C for 20–30 min to yield a predominantly single-cell suspension. To hasten digestion, tissue was gently pipetted every 5–10 min. The single-cell suspension was filtered through 20-μm cell strainers before use.

**Flow Cytometry and Cell Sorting.** The cell suspension was first incubated with anti-mouse CD16/32 (10 μg/m; BioLegend) for 5 min on ice to diminish nonspecific binding. Biotin-conjugated anti-mouse CD133 (clone 13A4; 5 μg/mL; eBioscience) or control biotin-conjugated rat IgG1 isotype (5 μg/mL; eBioscience) antibodies were added, and cells were incubated on ice for 20 min. After two washes with PBS/BSA, cells were incubated with streptavidin-labeled allophycocyanin (2 μg/mL; BioLegend) on ice for 15 min. Cells were washed twice in PBS/BSA and resuspended in PBS/BSA/DNase I that contained DAPI (0.2 μg/mL). Cell sorting was performed on an Aria-special order research product (SORP) (Becton Dickinson). All analyses included an initial gating of forward and side scatters to exclude cell debris. Sorting further excluded doublets by gating on forward-scatter width and side-scatter width, and live cells were selected by DAPI-negative staining. The purity of sorted population was routinely more than 95%.

**In Vitro Colony Assays.** Sorted CD133<sup>+</sup>Sox9/EGFP<sup>+</sup> cells (Fig. 4) or CD133<sup>+</sup> cells (Fig. 5) were resuspended at  $2.5 \times 10^3$  cells per 0.5 mL per well in methylcellulose-based colony culture medium as described previously (3–5). The semisolid culture mixture contained DMEM/F12 media, 1% methylcellulose (1,500 centipoise; Sinetsu Chemical), 50% (vol/vol) conditioned media from murine embryonic stem cell derived-pancreatic like cells, 5% (vol/vol) FCS, 10 mmol/L nicotinamide (Sigma), 10 ng/mL human recombinant activin- $\beta$ , 0.1 nmol/L exendin-4, and 1 ng/mL vascular endothelial growth factor-A (R&D). When indicated, R-Spondin1 (RSPO1) (R&D) was used at 750 ng/mL; Matrigel, 5% (vol/vol); or laminin hydrogel (3), 100  $\mu$ g/mL. Cells were plated in 24-well ultralow protein-binding plates and incubated in a humidified 5% (vol/vol) CO<sub>2</sub> atmosphere. To generate ring colonies for analysis, freshly sorted cells were plated in Matrigel-containing semisolid media and cultured for 3 wk. To generate endocrine/acinar colonies for analysis, total 3-wk-old primary colonies grown in Matrigel-containing semisolid media were pooled, washed twice with PBS/BSA, and dissociated into single-cell suspension by incubation with 0.25% trypsin-EDTA at 37 °C for 5 min. The single-cell suspension was then mixed in laminin hydrogel-containing semisolid media and incubated for an additional 2 wk.

**Microfluidic qRT-PCR.** The TaqMan probes purchased from ABI are listed as follows.

**TETs and TDG Knockdown.** Sorted pancreatic CD133<sup>+</sup>Sox9/EGFP<sup>+</sup>

| Murine gene                  | Assay ID from ABI |
|------------------------------|-------------------|
| $\beta$ -actin               | Mm 00607939_s1    |
| Insulin 1                    | Mm01259683_g1     |
| Insulin 2                    | Mm 00731595_gH    |
| Glucagon                     | Mm 00801712_m1    |
| Somatostatin                 | Mm 00436671_m1    |
| Pancreatic polypeptide (PPY) | Mm 00435889_m1    |
| Amylase 2A                   | Mm02342487_g1     |
| Carboxypeptidase A (CPA) 1   | Mm 00465942_m1    |
| Ngn3                         | Mm00436706_s1     |
| Pdx1                         | Mm 00435565_m1    |

cells were lentivirally transduced with appropriate short hairpin RNAs (shRNAs) as reported previously (6). shRNA sequences were cloned into the PLKO.1 vector under the control of the U6 promoter. Lentivirus was generated by cotransfecting the relevant construct and packaging plasmids into HEK293T cells. Transductions of pancreatic cells with lentiviral particles were performed using 2 mg/mL polybrene. Sixteen hours after transduction, cells were collected, washed, and plated in Matrigel with puromycin (2  $\mu$ g/mL).

**Dot Blot.** Genomic DNA was isolated from samples with a QIAamp mini DNA kit (Qiagen) according to the manufacturer's instructions. Genomic DNA was denatured with 0.1 M NaOH and spotted on nylon membranes (Millipore). The membranes were UV cross-linked and then blocked in 5% (wt/vol) skim milk in Tris-buffered saline (TBS) containing 0.1% Tween 20 (TBST) for 1 h at room temperature. Membranes were then incubated with antibodies against 5-hydroxymethylcytosine (5hmC) (Active Motif; 1:10,000 dilution) or 5-methylcytosine (5mC) (Eurogentec; 1:1,000 dilution) overnight at 4 °C. After three washes with TBST, membranes were incubated with 1:2,000 dilution of horseradish peroxidase-conjugated anti-rabbit or anti-mouse IgG second-

ary antibody, respectively. The membranes were then washed with TBST and exposed to peroxidase-conjugated secondary antibodies (Amersham Bioscience). Signal of dots were quantified by ImageJ software.

**Immunoblotting.** Total cell lysis and Western blot analysis were performed as described previously (2). The following antibodies were used: anti-Tet1 (Millipore; 1:1,000 dilution), anti-Tet2 (Digenode; 1:1,000 dilution), anti-TDG (Acris Antibodies; 1:1,000 dilution), and anti-HSP70 (Santa Cruz Biotechnology; 1:1,000 dilution).

**Whole-Mount Immunostaining of Ring and Endocrine/Acinar Colonies.** Antibody staining of DNA hydroxymethylation was carried out as previously described (3, 7). Briefly, colonies were handpicked and fixed in 4% (wt/vol) paraformaldehyde at 4 °C overnight. Colonies were then incubated with blocking buffer with 5% (vol/vol) donkey serum and 0.1% Triton X-100 at 4 °C overnight. Primary antibodies used are listed as follows and were detected with appropriate secondary antibodies conjugated to Cy3 or DyLight488 (1:2,000; Jackson ImmunoResearch). ApoTome images were captured on a LSM510 Meta Inverted 2 Photon microscope, and figures were prepared with Adobe Photoshop/Illustrator CS3.

| Primary antibodies   |             |                        |          |
|----------------------|-------------|------------------------|----------|
| Antigen              | Species     | Source                 | Dilution |
| Insulin              | Guinea pig  | Abcam                  | 1:500    |
| 5hmC                 | Rabbit      | Active Motif           | 1:500    |
| Ngn3                 | Rabbit      | Millipore              | 1:500    |
| Ki67                 | Mouse       | BD Pharmingen          | 1:500    |
| Secondary antibodies |             |                        |          |
| Antigen              | Conjugation | Source                 | Dilution |
| Rabbit               | DyLight-488 | Abcam                  | 1:2,000  |
| Mouse/Guinea Pig     | Cy3         | Jackson ImmunoResearch | 1:2,000  |

**Islet Isolation from Postnatal Mice.** Islet isolation was carried out as previously described with some modifications (8). Briefly, pancreata were dissected from postnatal day 4 or 7 mice, placed in a 50-mL conical tube with 1 mL of PBS containing collagenase B (2–4 mg/mL per 10 pancreata) (Roche) and DNase I (2,000 U/mL per 10 pancreata) (Calbiochem), and incubated at 37 °C for 5 min. The partially digested tissues were mixed with a cold buffer (designated as medium A; 40 mL) containing 0.1% 1 M Hepes and 0.04% Serum Replacement (Invitrogen) in HBSS, kept on ice for 2 min, and then centrifuged at  $218 \times g$  for 2 min at 4 °C. Cell pellets were resuspended in 10 mL of Histopaque-1077 (Sigma), and 10 mL of medium A was slowly overlaid on top in a 50-mL conical tube, and centrifuged at  $428 \times g$  for 25 min at 4 °C. The islets cell clusters enriched at the interphase were recovered and designated as the islet fraction, and the remaining clusters were designated as nonislet fraction.

**Determination of Islet Number.** Pancreata were dissected from postnatal day 10 mice, fixed in formalin, embedded in paraffin, sectioned (5- $\mu$ m thickness), and stained with H&E. Total islet number per pancreas was determined as described previously (9).

1. Hahn MA, et al. (2013) Dynamics of 5-hydroxymethylcytosine and chromatin marks in Mammalian neurogenesis. *Cell Rep* 3(2):291–300.

2. Meng Z, et al. (2010) miR-194 is a marker of hepatic epithelial cells and suppresses metastasis of liver cancer cells in mice. *Hepatology* 52(6):2148–2157.

- Jin L, et al. (2013) Colony-forming cells in the adult mouse pancreas are expandable in Matrigel and form endocrine/acinar colonies in laminin hydrogel. *Proc Natl Acad Sci USA* 110(10):3907–3912.
- Ku HT, et al. (2007) Insulin-expressing colonies developed from murine embryonic stem cell-derived progenitors. *Diabetes* 56(4):921–929.
- Winkler M, et al. (2011) A quantitative assay for insulin-expressing colony-forming progenitors. *J Vis Exp* (57):e3148.
- Ito S, et al. (2010) Role of Tet proteins in 5mC to 5hmC conversion, ES-cell self-renewal and inner cell mass specification. *Nature* 466(7310):1129–1133.
- Ficz G, et al. (2011) Dynamic regulation of 5-hydroxymethylcytosine in mouse ES cells and during differentiation. *Nature* 473(7347):398–402.
- Zmuda EJ, Powell CA, Hai T (2011) A method for murine islet isolation and subcapsular kidney transplantation. *J Vis Exp* (50):2096.
- Bock T, Pakkenberg B, Buschard K (2005) Genetic background determines the size and structure of the endocrine pancreas. *Diabetes* 54(1):133–137.

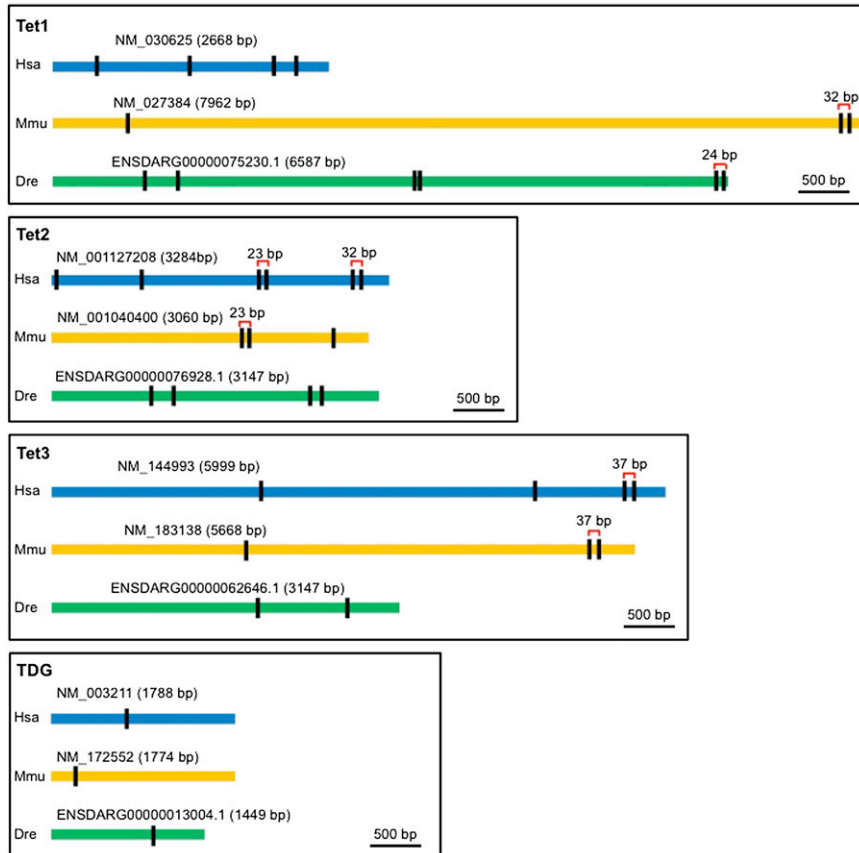

**Fig. S1.** Location of miR-26a target sites in the 3'-UTR of TET1/2/3 and TDG. TargetScan predicted potential miR-26 target sites in the 3'-UTR of TET1/2/3 and TDG are shown as black rectangles. Sites within cooperative distance of each other (within 40 nt, but no closer than 8 nt) are indicated (square brackets). Dre, zebrafish; Hsa, human; Mmu, mouse.

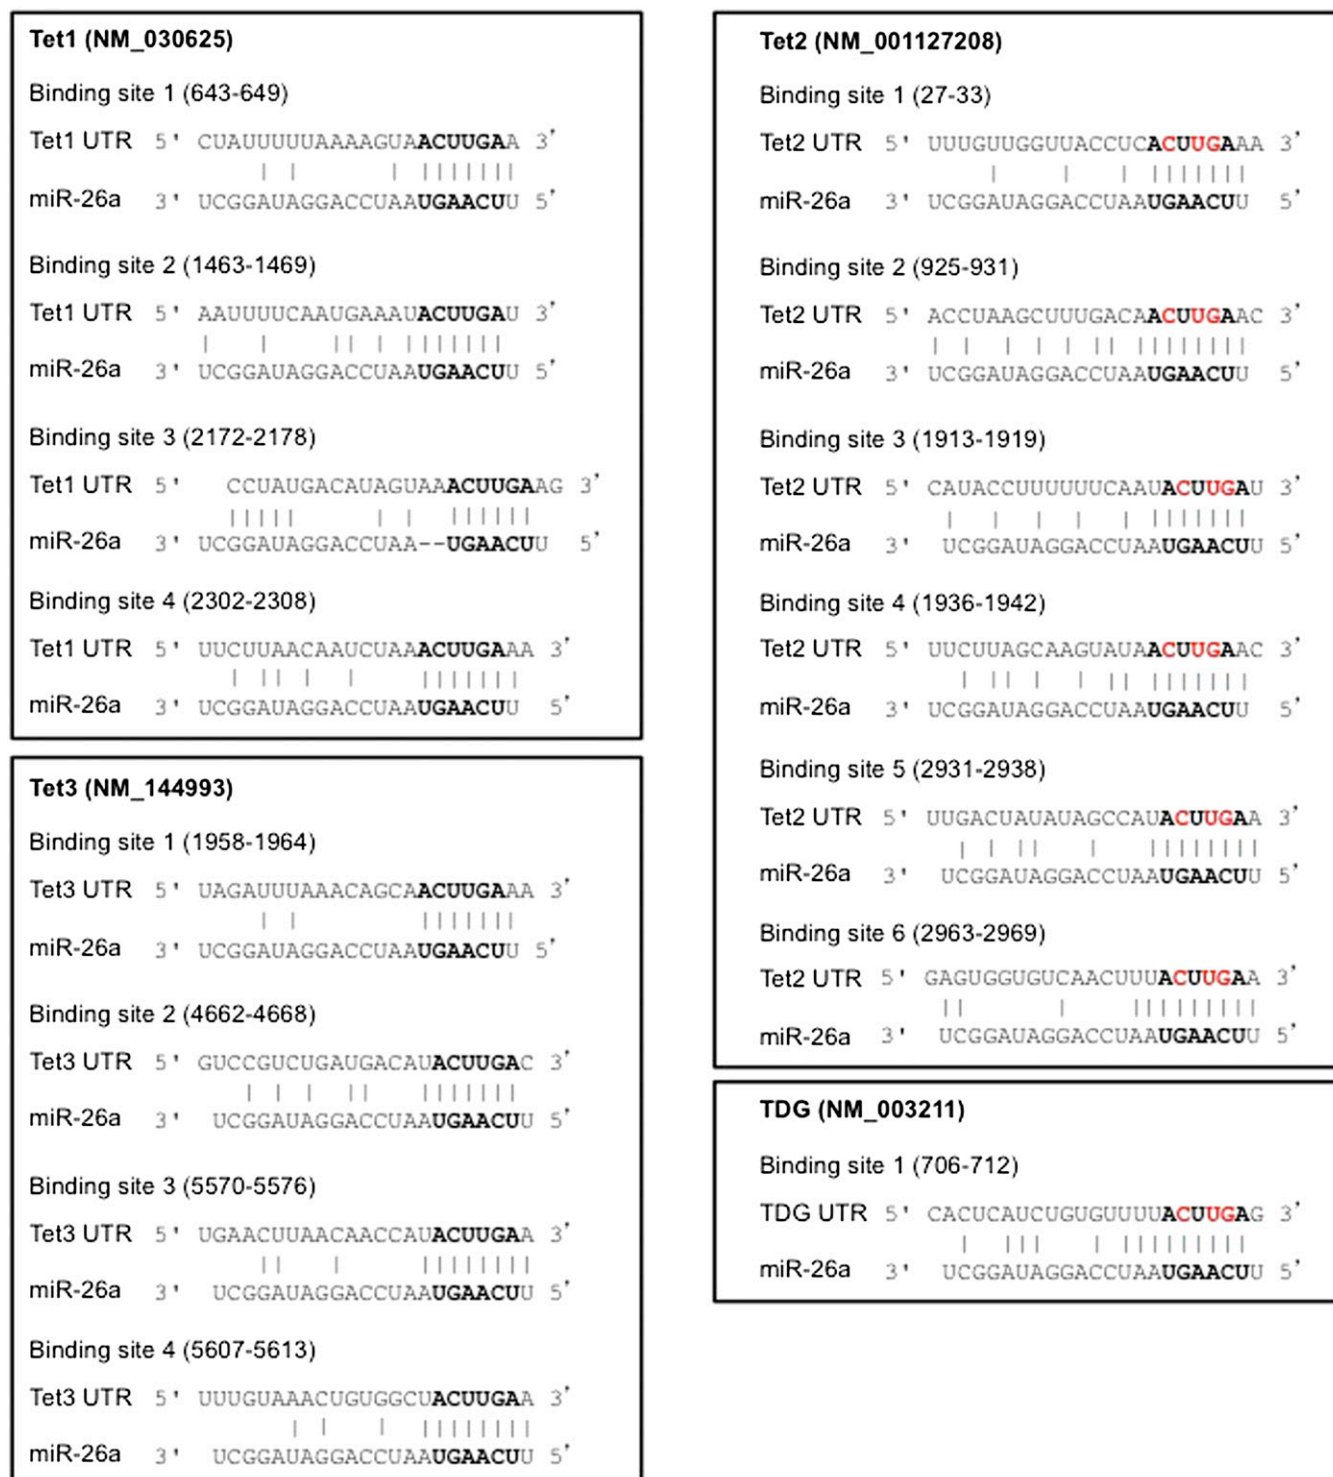

Fig. S2. Putative miR-26a target sites in the 3'-UTR of TET1/2/3 and TDG. The seed sequence of predicted miR-26a binding sites in the indicated human genes are shown by bolded sequence. Sites of point mutations made to abolish the potential pairing at the seed regions are shown in red.







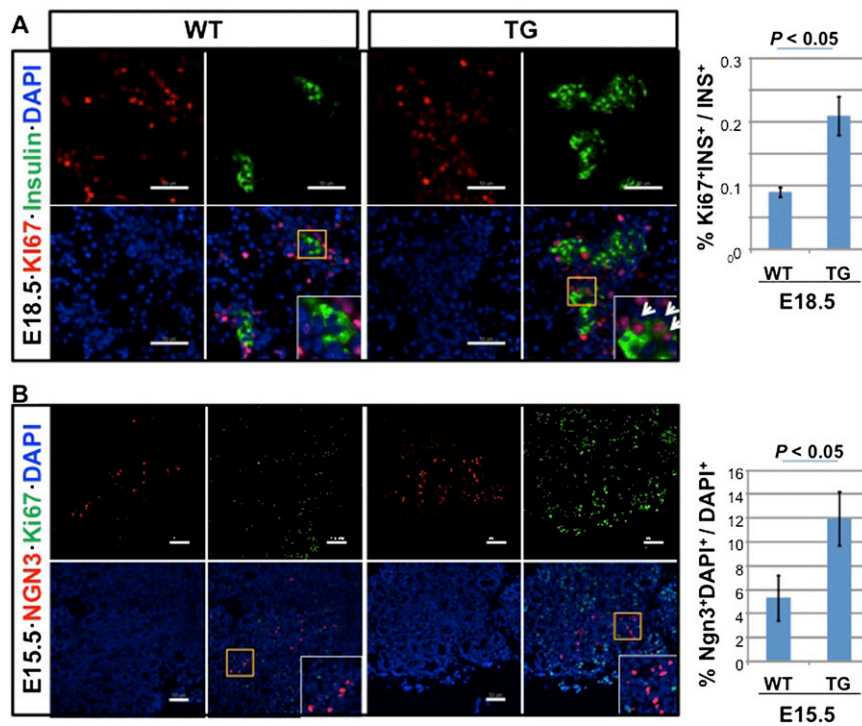

**Fig. S7.** miR-26a enhances proliferation and differentiation of the developing endocrine pancreas. Confocal images of double immunostaining for insulin and Ki67 (A) or Ngn3 and Ki67 (B) in E18.5 (A) or E15.5 (B) pancreas. (Scale bars, 50  $\mu$ m.) (A) Insulin-expressing cells are actively proliferating (arrows). (B) Note the higher percentage of Ngn3<sup>+</sup> cells among total cells in miR-26a transgenic (TG) compared with wild-type (WT) pancreas.

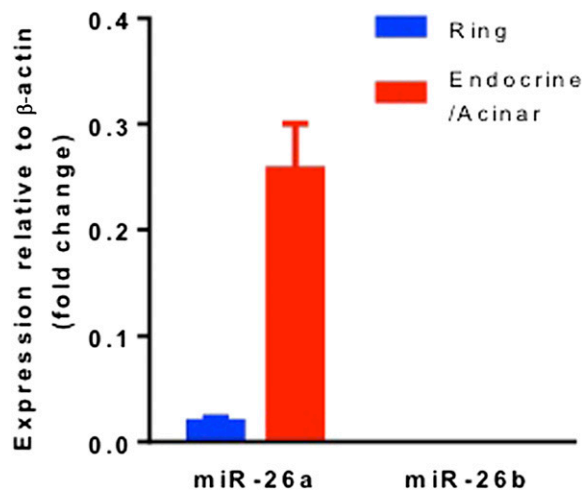

**Fig. S8.** miR-26a is the major miR-26 family member being expressed by in vitro differentiated cells. Pancreatic CD133<sup>+</sup>Sox9/EGFP<sup>+</sup> cells were FACS sorted from adult Sox9/EGFP transgenic mice and plated in colony assays. miRNA expression in the resulting ring and endocrine/acinar colonies was determined by qRT-PCR. Data are shown as mean  $\pm$  SD.

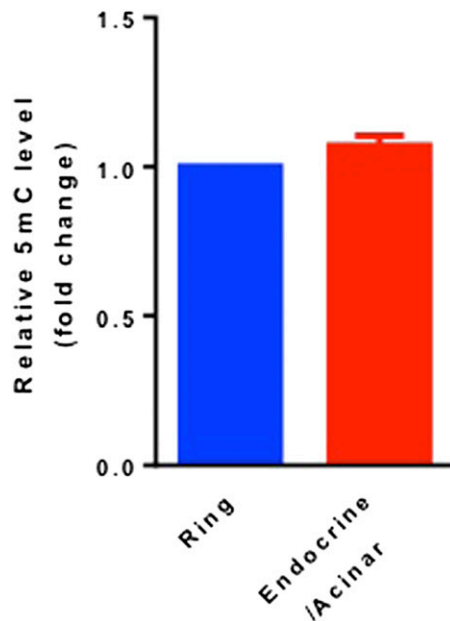

**Fig. S9.** 5mC levels are not altered in in vitro differentiated pancreatic cells. Amount of 5mC in genomic DNA isolated from ring or endocrine/acinar colonies was determined by dot blot analysis. Data are shown as mean  $\pm$  SD.

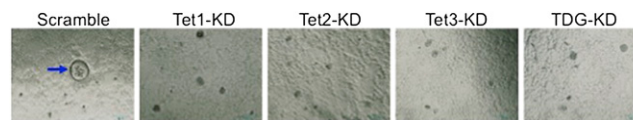

**Fig. S10.** Knockdown of TETs and TDG reduces the formation of ring colonies in vitro. CD133<sup>+</sup>Sox9/EGFP<sup>+</sup> cells were FACS sorted from adult (2- to 4-mo-old) pancreata of Sox9/EGFP transgenic mice and transduced with lentiviral vectors expressing shRNA against Tet1, Tet2, Tet3, or TDG. After 24 h of incubation, cells were plated in Matrigel-containing colony assay for 3 wk. The arrow indicates a resulting ring colony.

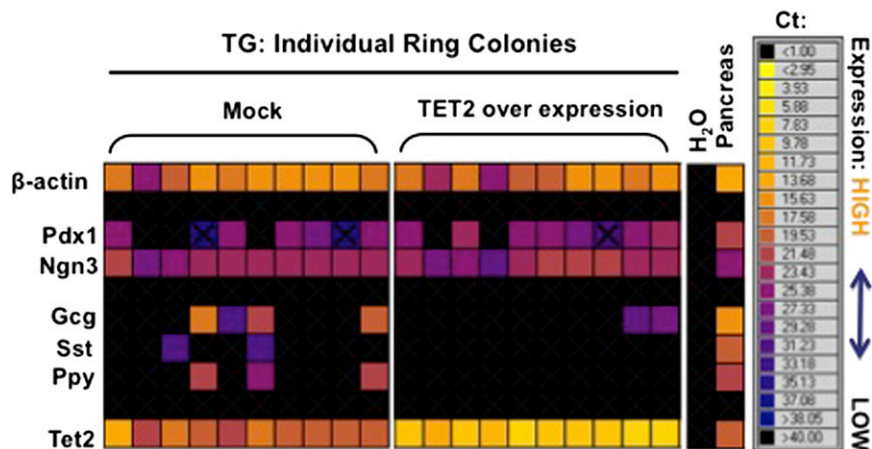

**Fig. S11.** TET2 overexpression inhibits endocrine cell differentiation in vitro. Microfluidic qRT-PCR analysis of individually handpicked ring colonies originated from adult miR-26a TG mice. FACS-sorted pancreatic CD133<sup>+</sup> cells were transfected with or without TET2-overexpressing plasmids. After 48 h, cells were plated in Matrigel-containing colony assay and cultured for 3 wk for ring colony formation. Each column indicates a single colony.
